# Supplementary material for: The Effect of Tailored Web-Based Feedback and Optional Telephone Coaching on Health Improvements: A Randomized Intervention Among Employees in the Transport Service Industry
Source: PubMed Central journal article supplement (PMC4999534; doi:10.2196/jmir.4005), 2016-08-11
Supplement: jmir_v18i8e158_app2.pdf [file jmir_v18i8e158_app2.pdf]

Supplemental file

**Table 3.** The participants’ reported health at baseline and follow-up (n=981).

| Health behaviors                                                     |                                    |                  |                                            |                  |                                                        |                  | Comparison of differences between follow-up and baseline among groups <sup>1</sup> |
|----------------------------------------------------------------------|------------------------------------|------------------|--------------------------------------------|------------------|--------------------------------------------------------|------------------|------------------------------------------------------------------------------------|
|                                                                      | Group A (n= 356)<br><i>Control</i> |                  | Group B (n=301)<br><i>Intervention web</i> |                  | Group C (n=324)<br><i>Intervention web + telephone</i> |                  | p-value                                                                            |
|                                                                      | <i>Baseline</i>                    | <i>Follow-up</i> | <i>Baseline</i>                            | <i>Follow-up</i> | <i>Baseline</i>                                        | <i>Follow-up</i> |                                                                                    |
| <i>Body composition</i>                                              |                                    |                  |                                            |                  |                                                        |                  |                                                                                    |
| BMI, kg/m <sup>2</sup> , mean (SD) <sup>2</sup>                      | 26.6 (4.5)                         | 26.6 (4.6)       | 26.6 (4.4)                                 | 26.5 (4.1)       | 26.1 (4.0)                                             | 26.2 (4.0)       | 0.36                                                                               |
| <i>Dietary intake</i> <sup>3</sup>                                   |                                    |                  |                                            |                  |                                                        |                  |                                                                                    |
| Eat breakfast, days/week, mean (SD)                                  | 6.2 (1.6)                          | 6.47 (1.2)       | 6.2 (1.7)                                  | 6.5 (1.3)        | 6.3 (1.5)                                              | 6.49 (1.2)       | 0.26                                                                               |
| Carbohydrates, times/week, mean (SD)                                 | 21.5 (8.2)                         | 22.1 (8.3)       | 23.2 (8.0)                                 | 22.8 (8.2)       | 22.7 (8.0)                                             | 22.37 (8.6)      | 0.10                                                                               |
| Sugar, times/week, mean (SD)                                         | 9.1 (5.5)                          | 8.4 (5.7)        | 8.5 (5.3)                                  | 8.1 (5.1)        | 9.0 (5.3)                                              | 8.06 (5.0)       | 0.19                                                                               |
| Saturated fats, times/week, mean (SD)                                | 16.8 (7.4)                         | 16.5 (7.1)       | 16.4 (7.2)                                 | 16.6 (6.7)       | 16.9 (6.9)                                             | 16.97 (6.5)      | 0.57                                                                               |
| Unsaturated fats , times/week, mean (SD)                             | 9.1 (5.0)                          | 9.6 (5.1)        | 9.8 (5.1)                                  | 10.3 (5.4)       | 9.7 (5.2)                                              | 10.0 (5.4)       | 0.85                                                                               |
| <i>Physical activity</i>                                             |                                    |                  |                                            |                  |                                                        |                  |                                                                                    |
| days/week, mean (SD)                                                 | 2.1 (1.9)                          | 2.3 (1.9)        | 2.2 (1.8)                                  | 2.3 (1.8)        | 2.3 (1.9)                                              | 2.6 (2.0)        | 0.36                                                                               |
| min/these days, mean (SD)                                            | 50.7 (17.0)                        | 50.4 (17.0)      | 48.2 (17.2)                                | 48.0 (17.7)      | 50.3 (18.0)                                            | 50.7 (17.3)      | 0.67                                                                               |
| <i>Stress</i>                                                        |                                    |                  |                                            |                  |                                                        |                  |                                                                                    |
| Feel stressed now “quite a lot” or “very much” n (%)                 | 42 (11.8)                          | 35 (9.8)         | 33 (11.0)                                  | 22 (7.3)         | 29 (8.9)                                               | 26 (8.0)         | 0.82                                                                               |
| <i>Sleep</i>                                                         |                                    |                  |                                            |                  |                                                        |                  |                                                                                    |
| ≤5 hours/night, “frequently” or “mostly” n (%)                       | 58 (16.3)                          | 49 (13.8)        | 57 (18.9)                                  | 55 (18.3)        | 55 (17.0)                                              | 41 (12.7)        | 0.36                                                                               |
| ≥9 hours/night, “frequently” or “mostly” n (%)                       | 50 (14.0)                          | 45 (12.6)        | 41 (13.6)                                  | 32 (10.6)        | 36 (11.1)                                              | 26 (8.0)         | 0.12                                                                               |
| Feel well-rested after sleeping, “often”, “mostly” or “always” n (%) | 107 (30.1)                         | 98 (27.5)        | 73 (24.2)                                  | 71 (23.6)        | 80 (24.7)                                              | 84 (25.9)        | 0.17                                                                               |
| <i>Alcohol intake</i>                                                |                                    |                  |                                            |                  |                                                        |                  |                                                                                    |
| No of occasions of alcohol consumption*, n (%)                       |                                    |                  |                                            |                  |                                                        |                  |                                                                                    |
| Never                                                                | 15 (4.2)                           | 19 (5.3)         | 19 (6.3)                                   | 19 (6.3)         | 18 (5.6)                                               | 18 (5.6)         | 0.40                                                                               |
| 1 time/m or less                                                     | 97 (27.2)                          | 91 (25.6)        | 82 (27.2)                                  | 79 (26.2)        | 76 (23.5)                                              | 90 (27.8)        |                                                                                    |
| 2-3 times/month                                                      | 179 (50.3)                         | 183 (51.4)       | 144 (47.8)                                 | 146 (48.5)       | 185 (57.1)                                             | 176 (54.3)       |                                                                                    |
| 2-3 times/week                                                       | 60 (16.8)                          | 56 (15.7)        | 53 (17.6)                                  | 52 (17.3)        | 38 (11.7)                                              | 32 (9.9)         |                                                                                    |
| ≥4-6 times/week                                                      | 5 (1.4)                            | 7 (2.0)          | 3 (1.0)                                    | 5 (1.7)          | 7 (2.2)                                                | 8 (2.5)          |                                                                                    |
| Number of glasses during a typical alcohol occasion, n (%)           |                                    |                  |                                            |                  |                                                        |                  |                                                                                    |
| 1-2 glasses                                                          | 129 (38.0)                         | 144 (43.0)       | 113 (40.5)                                 | 129 (46.1)       | 126 (42.0)                                             | 132 (43.8)       | 0.59                                                                               |
| 3-4 glasses                                                          | 121 (35.7)                         | 120 (35.8)       | 116 (41.6)                                 | 112 (40.0)       | 113 (37.7)                                             | 114 (37.9)       |                                                                                    |
| ≥ 5 glasses                                                          | 89 (26.2)                          | 71 (21.2)        | 50 (17.9)                                  | 39 (13.9)        | 61 (20.3)                                              | 55 (18.3)        |                                                                                    |
| <i>Tobacco</i>                                                       |                                    |                  |                                            |                  |                                                        |                  |                                                                                    |
| Current smoking, “sometimes” or “daily” n (%)                        | 67 (18.8)                          | 69 (19.4)        | 47 (15.6)                                  | 42 (14.0)        | 44 (13.6)                                              | 43 (13.3)        | 0.59                                                                               |
| No of cigarettes per week, mean (SD)                                 | 14.4 (18.1)                        | 23.6 (21.0)      | 17.2 (17.5)                                | 15.5 (13.8)      | 19.4 (18.5)                                            | 23.6 (21.0)      | 0.56                                                                               |

<sup>1</sup> ANOVA (or Kruskal Wallis) for continuous variables; Chi-square test for categorical variables.

<sup>2</sup> Standard deviation.

<sup>3</sup> Questions assessing the intake of similar dietary components have been merged and computed to times/week.
